# Supplementary material for: Measurement report: Variations in surface SO 2 and NO x mixing ratios from 2004 to 2016 at a background site in the North China Plain
Source: Copernicus journal article supplement (doi:10.5194/acp-22-7071-2022), 2022-06-01
Supplement: Supplementary file 1 [file acp-22-7071-2022-supplement.pdf]

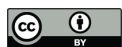

*Supplement of*

**Measurement report: Variations in surface SO<sub>2</sub> and NO<sub>x</sub> mixing ratios from 2004 to 2016 at a background site in the North China Plain**

**Xueli Liu et al.**

*Correspondence to:* Weili Lin ([linwl@muc.edu.cn](mailto:linwl@muc.edu.cn))

The copyright of individual parts of the supplement might differ from the article licence.

## Supplementary Materials

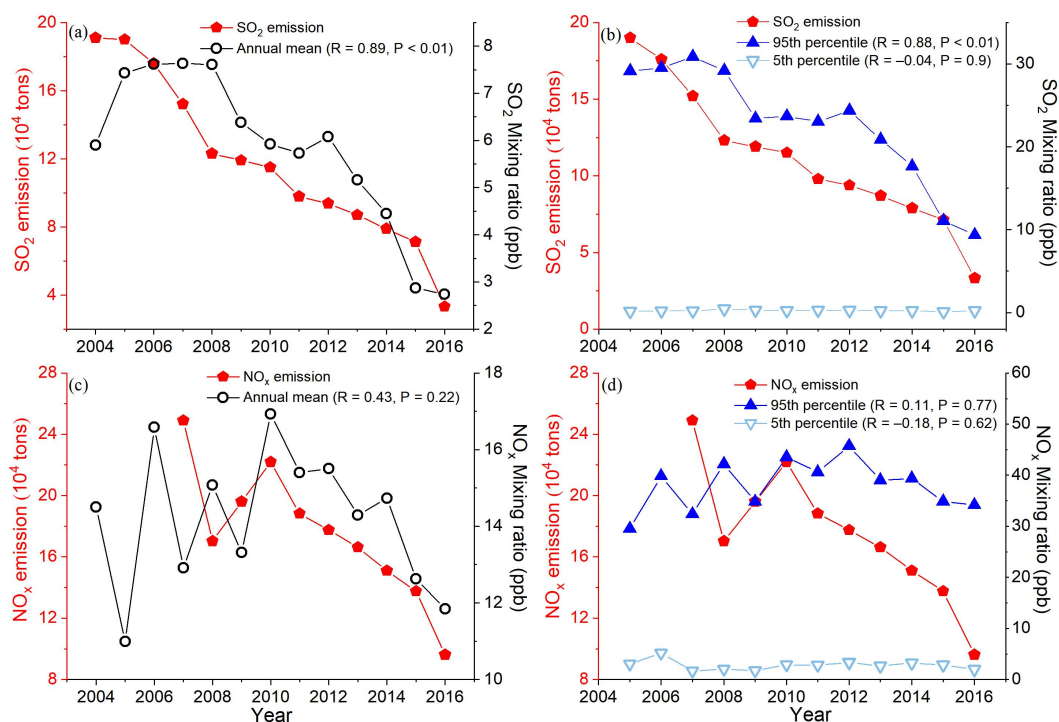

**Figure S1.** Annually variations in (a) SO<sub>2</sub> mixing ratios at SDZ and total SO<sub>2</sub> emissions in Beijing; (b) the 5th and 95th percentile of the hourly mean of SO<sub>2</sub> and SO<sub>2</sub> emissions in Beijing; (c) NO<sub>x</sub> mixing ratios at SDZ and total NO<sub>x</sub> emissions in Beijing; (d) the 5th and 95th percentile of the hourly mean of NO<sub>x</sub> and NO<sub>x</sub> emissions in Beijing.

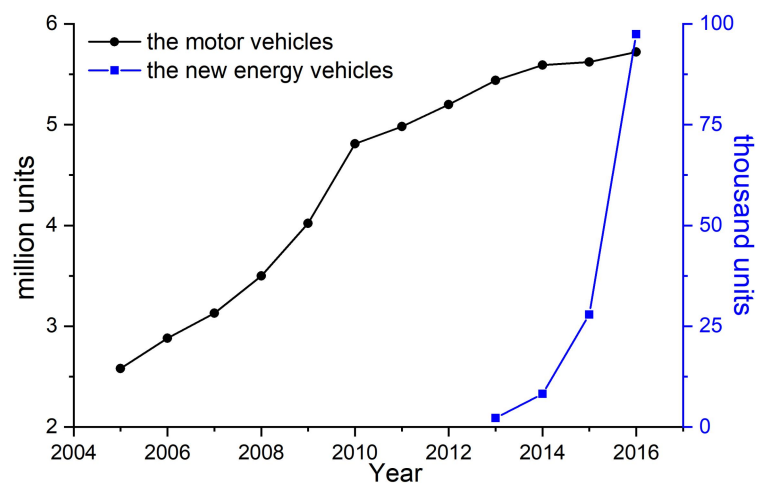

**Figure S2.** The motor vehicle and new energy vehicle population in Beijing in recent years.

(The data are provided by Beijing Traffic Management Bureau and Beijing Transportation Development Research Institute.)

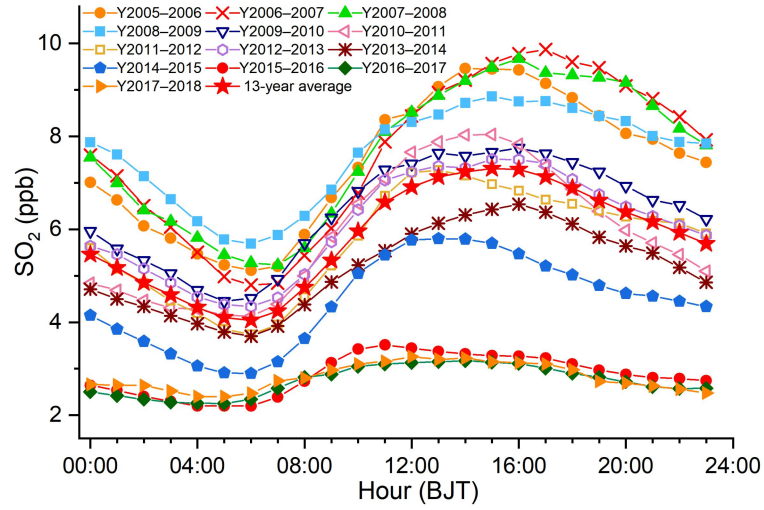

**Figure S3.** The average diurnal variations in  $\text{SO}_2$  mixing ratios in different years at SDZ.

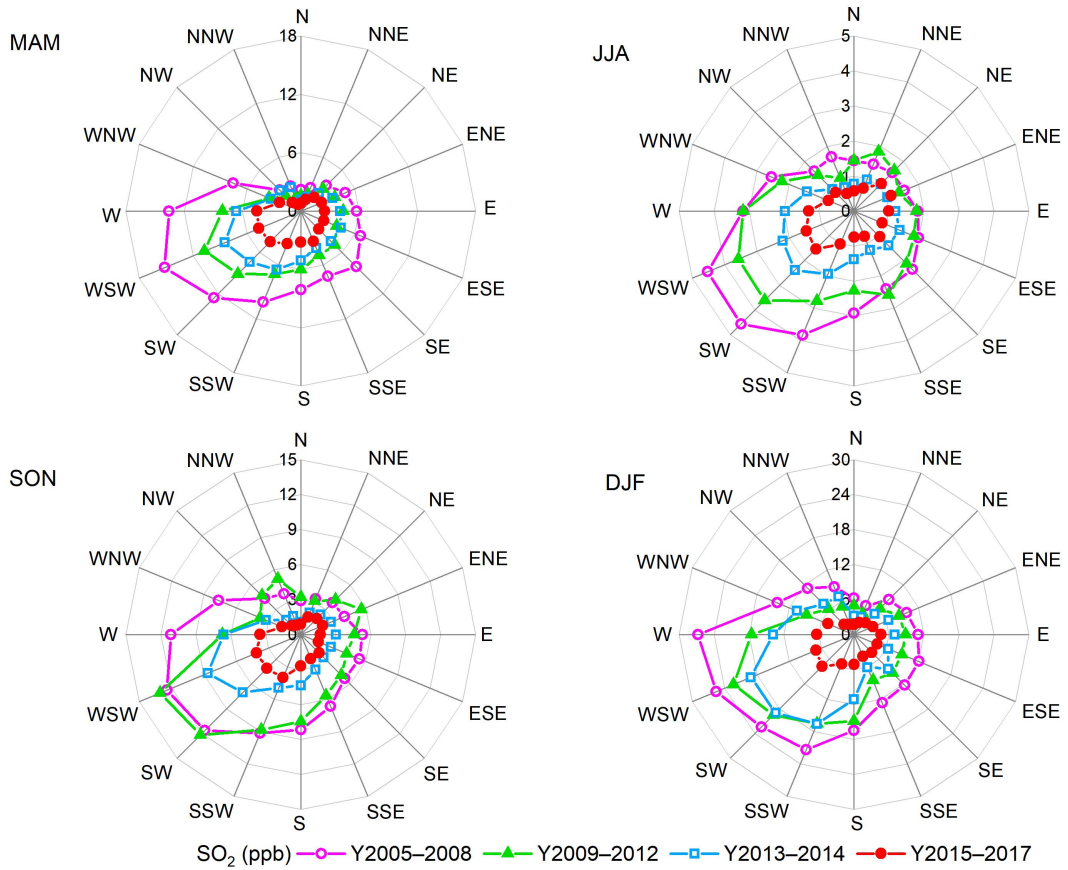

**Figure S4.** Mixing ratios of  $\text{SO}_2$  in four seasons during different stages as a function of wind direction at SDZ.

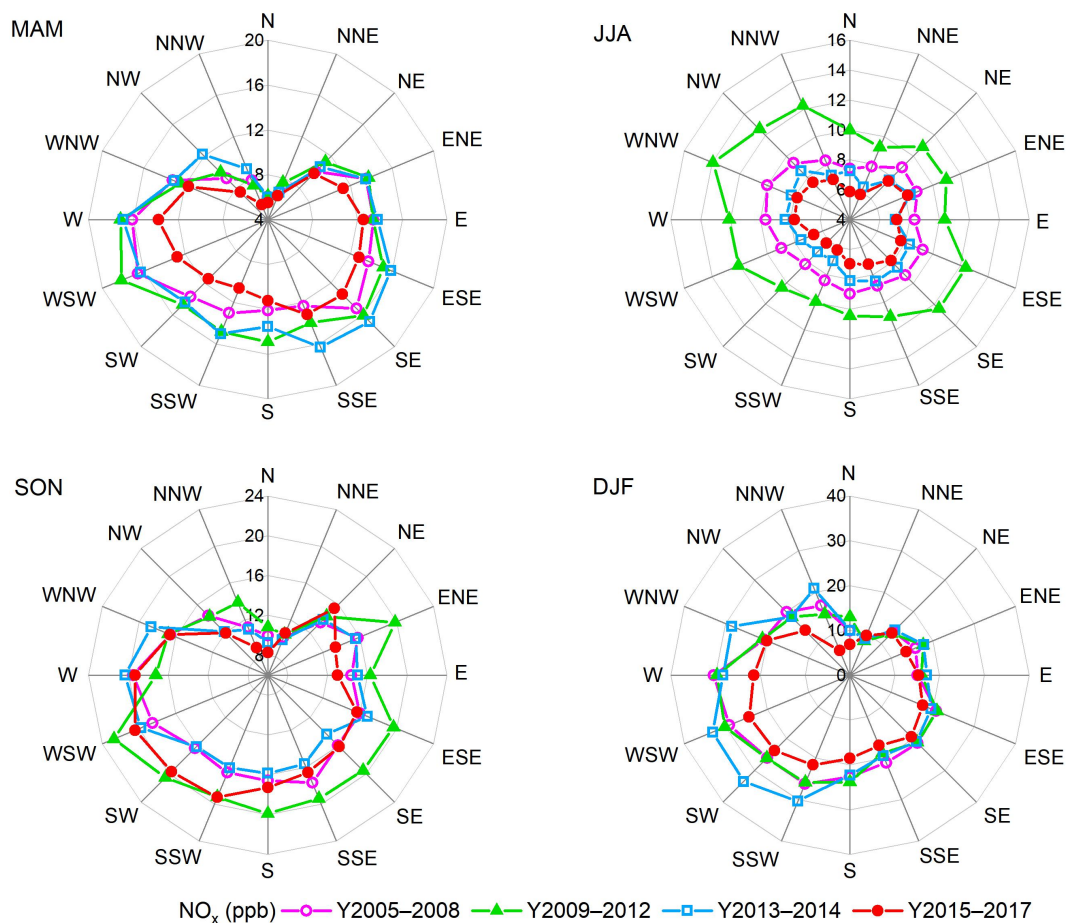

**Figure S5.** Mixing ratios of NO<sub>x</sub> in four seasons during different stages as a function of wind direction at SDZ.

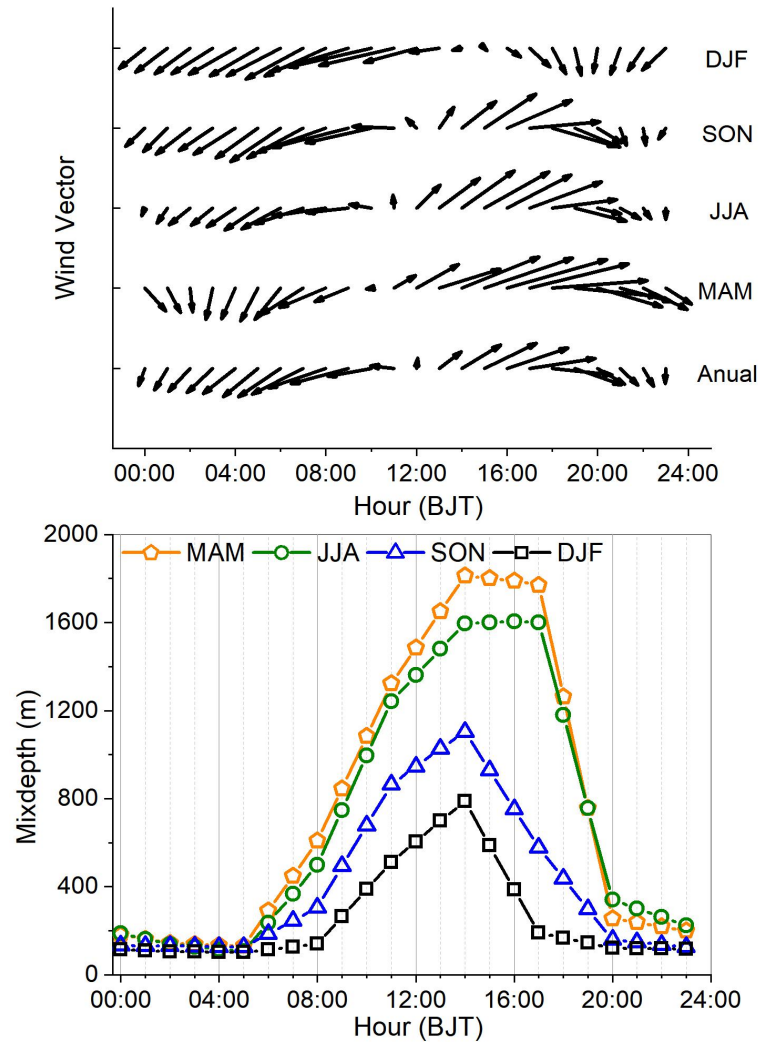

**Figure S6.** The average diurnal variations in wind vectors and mixing depth in different seasons at SDZ.

**Table S1.** The frequency distributions (%) of wind directions in different stages.

| WD  | Y2005–2008 | Y2009–2012 | Y2013–2014 | Y2015–2017 |
|-----|------------|------------|------------|------------|
| N   | 3.4        | 3.4        | 2.9        | 3.8        |
| NNE | 5.4        | 6.1        | 5.4        | 8.0        |
| NE  | 12.6       | 13.9       | 12.1       | 15.3       |
| ENE | 18.1       | 16.9       | 16.8       | 16.2       |
| E   | 11.3       | 9.5        | 10.8       | 8.6        |
| ESE | 3.1        | 3.0        | 3.9        | 3.4        |
| SE  | 2.2        | 2.2        | 2.6        | 2.4        |
| SSE | 1.6        | 1.9        | 2.2        | 2.0        |
| S   | 1.8        | 2.1        | 2.3        | 2.1        |
| SSW | 3.4        | 4.0        | 3.5        | 4.5        |
| SW  | 9.8        | 11.1       | 10.5       | 10.0       |
| WSW | 13.8       | 14.7       | 14.6       | 11.8       |
| W   | 8.1        | 6.2        | 7.4        | 6.4        |
| WNW | 2.1        | 1.8        | 2.1        | 2.1        |
| NW  | 1.4        | 1.4        | 1.3        | 1.5        |
| NNW | 1.8        | 1.9        | 1.6        | 1.9        |
